# Supplementary material for: The development and validation of an Interprofessional eye health education programme in Rwanda
Source: Research Square preprint supplement (doi:10.21203/rs.3.rs-6190567/v1), 2025-05-08

**APPENDIX I: KNOWLEDGE ASSESSMENT QUESTIONNAIRE AND SKILLS ASSESSMENT RUBRIC**

**INTERPROFESSIONAL EYE HEALTH EDUCATION TRAINING - KNOWLEDGE ACQUISITION ASSESSMENT TOOL**

**Instructions for trainees:** Select the single best answer for each question below.

**Section 1: Interprofessional Education and Collaborative Practice Competencies**

1. Select from below the most relevant collaborative practice competency required when practicing as a health care professional.
2. Role clarification
3. Research skills
4. Diagnostic capacity
5. Knowledge of anatomy
6. Knowledge of physiology
7. Which of the following professions is the most important in the delivery of collaborative health care?
8. Pharmacy
9. Nursing
10. Medicine
11. Ophthalmology
12. All are equally important.

**Section 2: International Classification for function-Disability and Health (ICF)**

1. What is the common goal of health professionals when utilizing the International Classification of Function Disability and Health (ICF) framework?
2. Health financing development
3. Ensuring patient participation in society
4. Written communication sharing among health professionals.
5. Supporting collaborative management of future pandemics
6. Increasing the number of hospitals in rural areas
7. When delivering holistic health care which of the following is the most important?
8. Collaboration to address all the needs of the patient.
9. Involvement of the family in care provision
10. Good communication between the professionals and patient
11. Assessment of barriers to participation in society
12. All the above

**Section 3: Need for eye health services.**

1. According to the WHO World Vision Report (2019), what percentage of the global population is affected by some form of visual impairment?
2. 0.5%
3. 5%
4. 16%
5. 40%
6. None of the above
7. According to the WHO, what is the most common cause of blindness globally:
8. Glaucoma
9. Trachoma
10. Cataract
11. Diabetic Retinopathy
12. Retinal detachment

**Section 4: Ophthalmic Clinical Care**

1. In the assessment of visual acuity which of the following is correct:
2. Only unaided visual acuity in the distance needs to be assessed.
3. There is no need to test near visual acuity.
4. The distance the chart is placed from the patient must be accurately measured.
5. Visual acuity is assessed in a dark room.
6. If a patient cannot read letters they cannot be assessed
7. A 3-month-old baby has bilateral red eyes with a thick sticky yellow discharge, this has been since birth. The following is the best action to take:
8. Tell her to go home and wash the baby’s face and come back if it gets worse.
9. Clean the eyes, give antibiotic ointment, and refer to an eye health professional urgently.
10. Advise the mother not to worry and tell them it is normal.
11. Prescribe steroids to use for 5 days and only come back if it gets worse.
12. The sticky eyes will settle, and no treatment is required.
13. In a chemical injury, what is the most appropriate action to take:
14. Tell the patient to keep their eyes shut and go to bed.
15. Immediately irrigate the eye with clean water and refer urgently to an eye health professional.
16. Reassure them that it will settle down on its own and send them away.
17. Wipe the eyelids with wet gauze and give antibiotics.
18. There is no treatment so do not offer them any help.
19. What can the fundal (red) reflex test help diagnose in babies and children?
20. Cataract and retinoblastoma
21. Diabetic retinopathy
22. Deafness
23. Brain injury
24. None of the above

Note: Correct answers can be requested from: [gf.kitema@ur.ac.rw](mailto:gf.kitema@ur.ac.rw) , [kitema.fiston@gmail.com](mailto:kitema.fiston@gmail.com)

**INTERPROFESSIONAL EYE HEALTH EDUCATION TRAINING - SKILLS ACQUISITION ASSESSMENT (OBJECTIVE STRUCTURED CLINICAL EXAMINATION - OSCE)**

In this skills assessment session, students will use around 10 minutes to complete the assessment. They will find instructions related to the skills that they need to perform on a simulated patient in a skills laboratory setting. The examiners will mark according to the steps completed.

**PART 1: QUICK HOLISTIC HISTORY FOR A PATIENT WITH AN EYE PROBLEM**

**Instructions for Assessors:** The participant should follow (by order) the following steps:

Award 1 mark for every step performed correctly (**Good**)

Half a mark (0.5) for **borderline** performance like skipping components in a step or low accuracy,

Zero marks (0) for **poor performance/ No attempt.**

| **Step to perform** | **Performance** | | |
| --- | --- | --- | --- |
| **Good** | **Borderline** | **Poor/ No attempt** |
| Ensure the patient is comfortable (Greetings, presentation) |  |  |  |
| Asked about the Patient Specifics (Names, Age, Gender) |  |  |  |
| Asked about the Chief complaint (What has brought the patient to seek care) |  |  |  |
| Asked about the history of the present illness (details of the problem) |  |  |  |
| History of past/general illness |  |  |  |
| Asked about Participation and functioning Difficulties that the patient has |  |  |  |

**PART 2: MEASURING DISTANCE VISION**

**Instructions for Assessors:** The participant should follow in order the following steps when measuring distance vision: Award 1 mark for every step performed correctly (**Good**), Half a mark (0.5) for **borderline** performance like skipping components in a step or low accuracy, and zero marks for **poor performance/ No attempt.**

| **Step to perform** | **Performance** | | |
| --- | --- | --- | --- |
| **Good** | **Borderline** | **Poor/ No attempt** |
| Prepare the 3m visual acuity chart |  |  |  |
| Ensures that the patient is in a suitable position to undertake the examination. |  |  |  |
| Stands close to the patient and give examination instructions. |  |  |  |
| Ensures the light source in the room should be coming from the back of the patient. |  |  |  |
| Explains the procedure and how to show the direction of the letter E during the test. |  |  |  |
| Stands 3m away |  |  |  |
| The eye not being tested is covered by the palm of the patient’s hand (not fingers) |  |  |  |
| Ask the patient to show the direction of the arms of this letter E |  |  |  |
| Records abnormal if the patient cannot see all letters or Es on the 7.5 line and Normal if they can see the whole 7.5 line and beyond |  |  |  |
| Repeats the same to the other eye |  |  |  |

**PART 3: FUNDAL REFLEX TEST**

**Instructions for Assessors:** The participant should follow the following steps:

Award 1 mark for every step performed correctly (**Good**)

Half a mark (0.5) for **borderline** performance like skipping components in a step or low accuracy,

Zero marks (0) for **poor performance/ No attempt.**

| **Step to perform** | **Performance** | | |
| --- | --- | --- | --- |
| **Good** | **Borderline** | **Poor/ No attempt** |
| Prepared the Arclight by selecting the brightest light setting with 3 clicks. |  |  |  |
| Ensures the examination room is quiet and dim. |  |  |  |
| Ensured the patient is comfortable |  |  |  |
| Explain to the patient what they are going to do (Reassure the patient about the light to be shone in their eyes) |  |  |  |
| Instructed the patient to look straight ahead ( behind the examiner) |  |  |  |
| Gets the sight hole close to the eye and at arm’s length observe the ‘fundal reflex’ in both eyes at the same time. |  |  |  |
| Describes loudly the brightness and colour between the two eyes. |  |  |  |
| Comments loudly on the presence or absence of any dark patches in the reflex or complete absence of the reflex. |  |  |  |
| Describes the reflex to be Normal or abnormal |  |  |  |

**PART 4: RED EYE MANAGEMENT AND COLLABORATIVE PRIMARY EYE CARE FOR PEOPLE WITH DIABETES AND HYPERTENSION**

**Instructions for Assessors:** The participant should follow the following steps:

Award 1 mark for every step performed correctly (**Good**)

Half a mark (0.5) for **borderline** performance like skipping components in a step or low accuracy,

Zero marks (0) for **poor performance/ No attempt.**

| **Step to perform** | **Performance** | | |
| --- | --- | --- | --- |
| **Good** | **Borderline** | **Poor/ No attempt** |
| Used the correct algorithm **(WHO-PEC Algorithm I, II, III, and IV -**<https://www.afro.who.int/publications/primary-eye-care-training-manual>) to guide management |  |  |  |
| Record symptoms, signs, and management clearly |  |  |  |
| Explain to the patient that Diabetic retinopathy includes the damage to small blood vessels in the eye |  |  |  |
| Advises the patient to Seek medical attention anytime your vision becomes blurry (possible rise in blood sugar) |  |  |  |
| Advises the patient to have a complete eye check every year |  |  |  |
| Advises the patient to keep their blood sugar under control and follow instructions from your health care provider |  |  |  |
| Advises the patient to exercise regularly and to stop smoking |  |  |  |

Note: The Training manual and details associated with this knowledge and skills assessment may be requested via: [gf.kitema@ur.ac.rw](mailto:gf.kitema@ur.ac.rw) , [kitema.fiston@gmail.com](mailto:kitema.fiston@gmail.com)


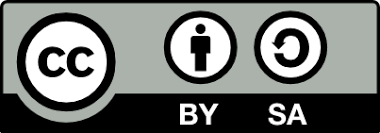

Supplement: Supplementary file 2 [file 506ccdd0640ea9c70b657b86.docx]
