# Supplementary material for: The development and validation of an Interprofessional eye health education programme in Rwanda
Source: Research Square preprint supplement (doi:10.21203/rs.3.rs-6190567/v1), 2025-05-08
Supplement: Supplementary file 1 [file 1ade7a90c62640068a3b192f.docx]

**APPENDIX II: KNOWLEDGE AND SKILLS ASSESSMENT TOOLS REVIEW AND VALIDATION**

*Knowledge assessment tool review summary.*

|  |  | **Expert I** | **Expert II** | **Expert III** | **Expert IV** | **I-CVI** | **Implication** |
| --- | --- | --- | --- | --- | --- | --- | --- |
|  |  |
| **Section 1:** Interprofessional Education and Collaborative practice competencies | Question 1 | 4 | 4 | 3 | 4 | 1 | Valid item |
| Question 2 | 4 | 4 | 3 | 4 | 1 | Valid item |
| **Section 2:** International Classification for function-Disability and Health (ICF) | Question 3 | 4 | 4 | 3 | 4 | 1 | Valid item |
| Question 4 | 4 | 4 | 4 | 4 | 1 | Valid item |
| **Section 3:** Need for eye health services | Question 5 | 4 | 4 | 4 | 4 | 1 | Valid item |
| Question 6 | 4 | 4 | 4 | 4 | 1 | Valid item |
| **Section 4:** Ophthalmic clinical care | Question 7 | 4 | 4 | 4 | 4 | 1 | Valid item |
| Question 8 | 4 | 4 | 4 | 4 | 1 | Valid item |
| Question 9 | 4 | 4 | 4 | 4 | 1 | Valid item |
| Question 10 | 4 | 4 | 4 | 4 | 1 | Valid item |
| **Total agreements** |  |  |  |  |  | 10 |  |
| **S-CVI/average** |  |  |  |  |  | 1 |  |

*Skills assessment tool review summary.*

|  |  | **Expert I** | **Expert II** | **Expert III** | **Expert IV** | **I-CVI** | **Implication** |
| --- | --- | --- | --- | --- | --- | --- | --- |
| **Section 1**: Holistic History taking | Question 1 | 4 | 4 | 3 | 4 | 1 | Valid item |
| Question 2 | 4 | 4 | 3 | 4 | 1 | Valid item |
| Question 3 | 4 | 4 | 4 | 4 | 1 | Valid item |
| Question 4 | 4 | 4 | 3 | 4 | 1 | Valid item |
| Question 5 | 4 | 4 | 4 | 4 | 1 | Valid item |
| Question 6 | 4 | 4 | 3 | 4 | 1 | Valid item |
| **Section 2:** Measuring Distance Vision | Question 1 | 4 | 4 | 4 | 4 | 1 | Valid item |
| Question 2 | 4 | 4 | 4 | 4 | 1 | Valid item |
| Question 3 | 4 | 4 | 3 | 4 | 1 | Valid item |
| Question 4 | 4 | 4 | 4 | 4 | 1 | Valid item |
| Question 5 | 4 | 4 | 3 | 4 | 1 | Valid item |
| Question 6 | 4 | 4 | 4 | 4 | 1 | Valid item |
| Question 7 | 4 | 4 | 4 | 4 | 1 | Valid item |
| Question 8 | 4 | 4 | 4 | 4 | 1 | Valid item |
| Question 9 | 4 | 4 | 4 | 4 | 1 | Valid item |
| Question 10 | 4 | 4 | 4 | 4 | 1 | Valid item |
| **Section 3:** Red Reflex test | Question 1 | 4 | 4 | 4 | 4 | 1 | Valid item |
| Question 2 | 4 | 4 | 4 | 4 | 1 | Valid item |
| Question 3 | 4 | 4 | 4 | 4 | 1 | Valid item |
| Question 4 | 4 | 4 | 4 | 4 | 1 | Valid item |
| Question 5 | 4 | 4 | 4 | 4 | 1 | Valid item |
| Question 6 | 4 | 4 | 3 | 4 | 1 | Valid item |
| Question 7 | 4 | 4 | 4 | 4 | 1 | Valid item |
| Question 8 | 4 | 4 | 4 | 4 | 1 | Valid item |
| Question 9 | 4 | 4 | 4 | 4 | 1 | Valid item |
| **Section 4:** Red eye Management and Collaborative Primary Eye Care for People with Diabetes and Hypertension | Question 1 | 4 | 4 | 4 | 4 | 1 | Valid item |
| Question 2 | 4 | 4 | 4 | 4 | 1 | Valid item |
| Question 3 | 4 | 4 | 4 | 4 | 1 | Valid item |
| Question 4 | 4 | 4 | 4 | 4 | 1 | Valid item |
| Question 5 | 4 | 4 | 4 | 4 | 1 | Valid item |
| Question 6 | 4 | 4 | 4 | 4 | 1 | Valid item |
| Question 7 | 4 | 4 | 4 | 4 | 1 | Valid item |
| **Total agreements** |  |  |  |  |  | 32 |  |
| **S-CVI/average** |  |  |  |  |  | 1 |  |
